# Supplementary material
Source: PubMed Central journal article supplement (PMC3557495)

**γ-IRRADIATION**

**Mitochondria**

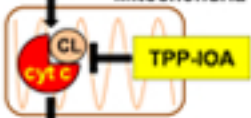

**TPP-IOA**

**APOPTOSIS**

Supplement: NIHMS425449-supplement-2.pdf [file NIHMS425449-supplement-2.pdf]
